# Supplementary material for: Association of vitamin D with risk of type 2 diabetes: A Mendelian randomisation study in European and Chinese adults
Source: PLOS journal article supplement (doi:10.1371/journal.pmed.1002566), 2018-05-02
Supplement: S7 (10.1371/journal.pmed.1002566.s007) [file journal.pmed.1002566.s007]

**S7 Fig: Association of genetic score using two synthesis SNPs and the lead transport SNP for plasma 25(OH)D concentration with risk of diabetes in a meta-analysis of all studies per 25 nmol/L higher genetically instrumented 25(OH)D concentration**

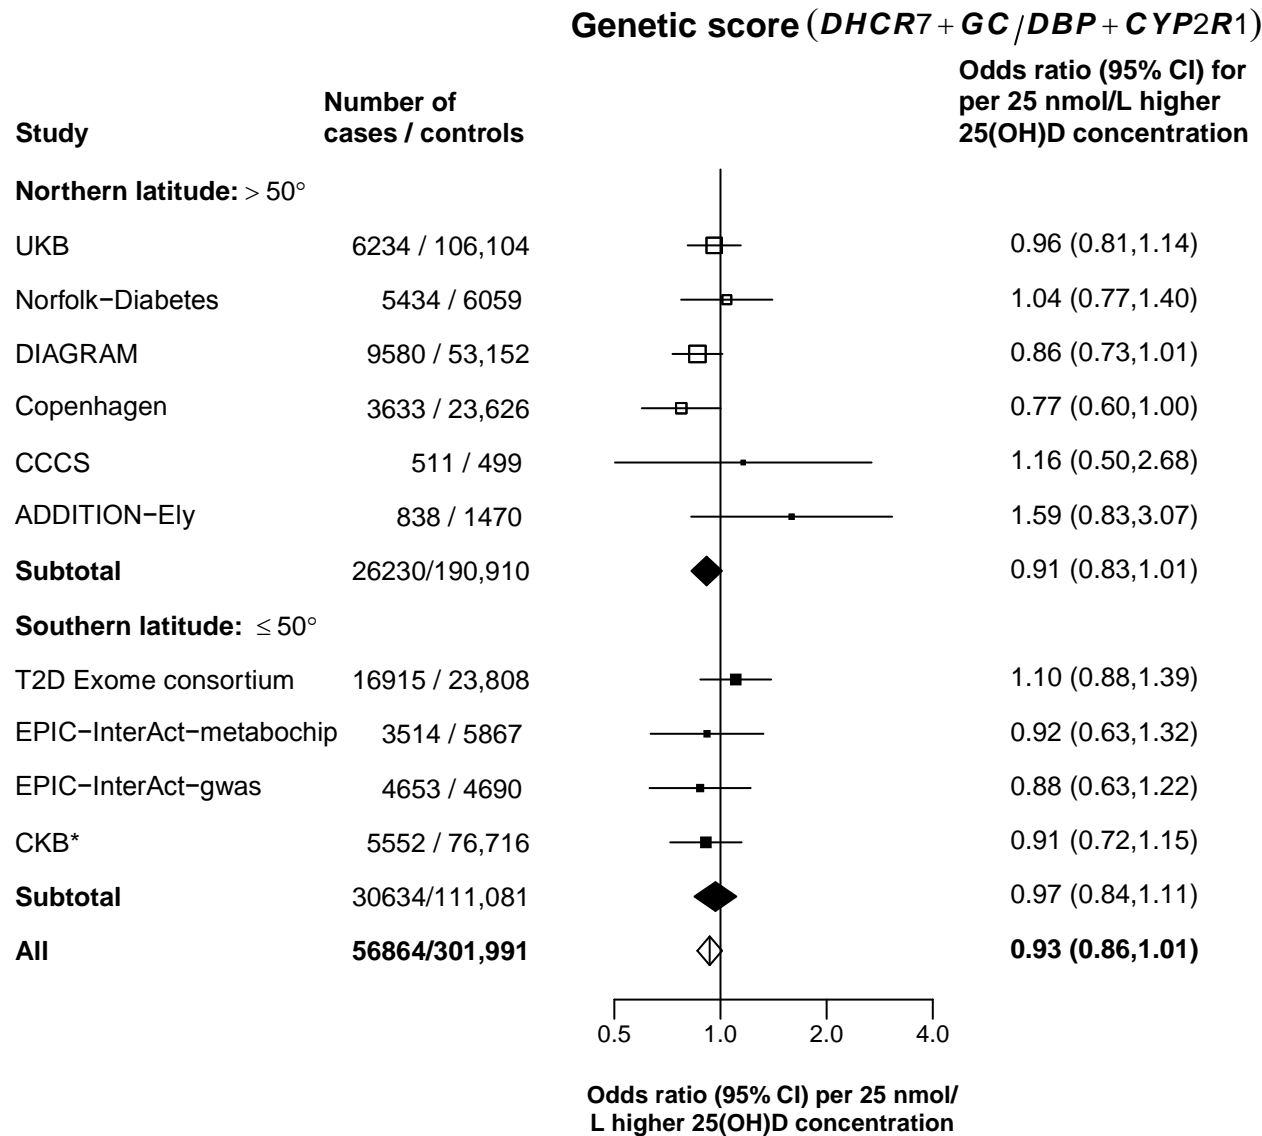

Heterogeneity p-value between latitude groups = 0.51  
P-value for overall effect = 0.09

\*Both CKB and all other studies are weighted by the effects of each SNP on 25(OH)D concentration.
